# Supplementary material
Source: Springer Nature journal article supplement (https://www.springermedizin.de/resource/supplementary/13075_2010_2869_MOESM4_ESM.pdf/9693078)

**A**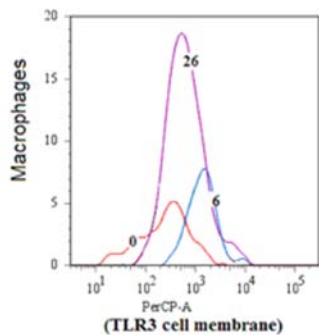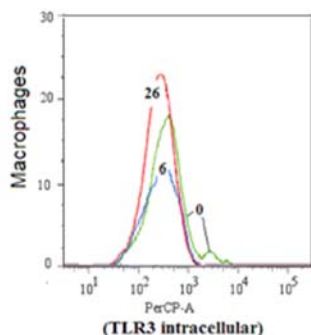**B**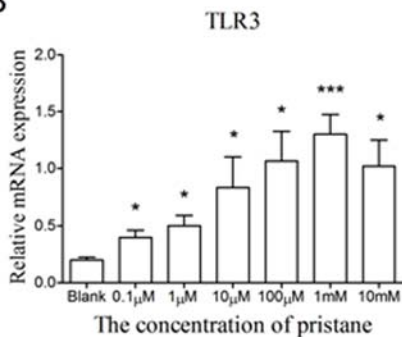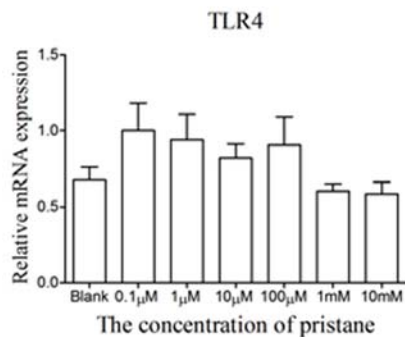**C**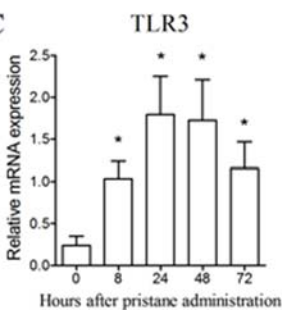**D**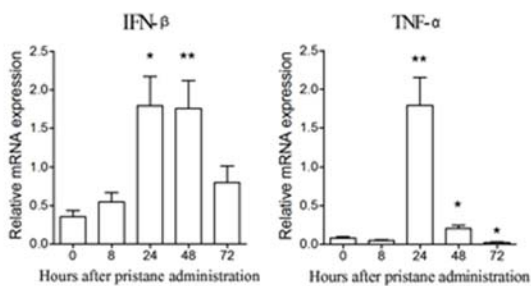**E**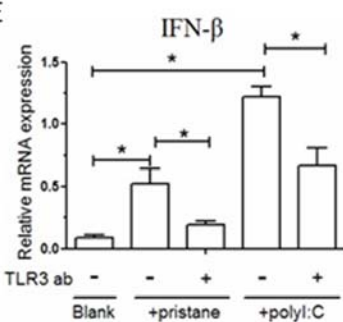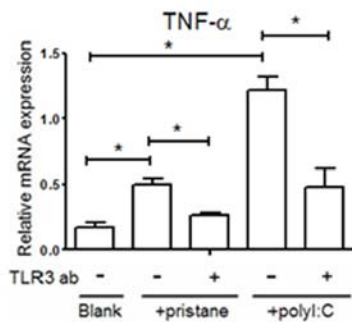

Supplement: MOESM4 [file 9693078]
